# Supplementary material
Source: publisher figshare collection journal article supplement (https://sage.figshare.com/ndownloader/files/15073520)
Supplement: Supplementary file 1 [file 15073520]

Supplemental Materials

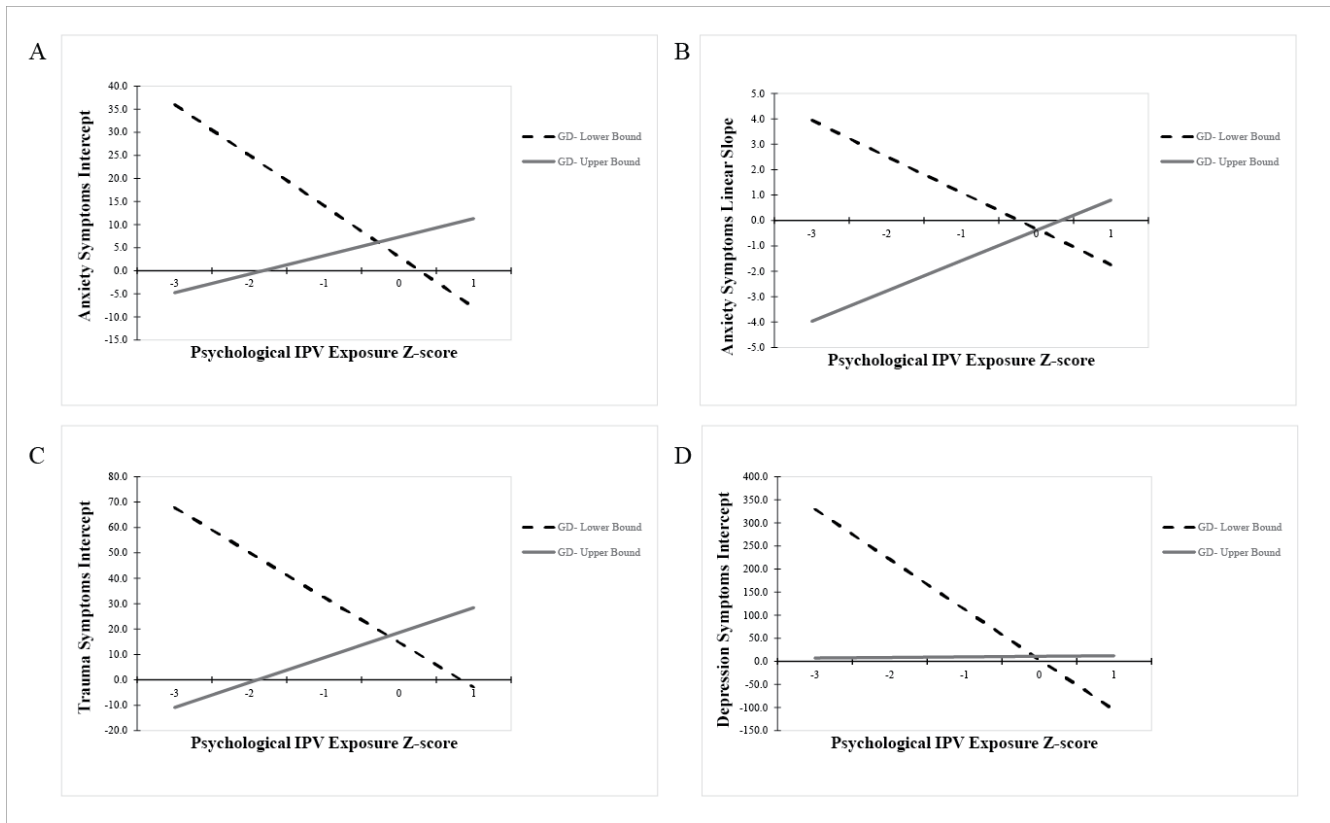

Figure 2. Gender discrimination interacts with exposure to psychological IPV to predict perinatal anxiety symptom severity(a) and trajectories (b), and trauma and depression symptom severity (c and d respectively). Lines show effects of psychological IPV exposure at the boundaries of the region of significance for gender discrimination scores—significant effects above upper boundary and below lower boundary.
